# Supplementary material for: Regulation of AUXIN RESPONSE FACTOR condensation and nucleo-cytoplasmic partitioning
Source: PubMed Central journal article supplement (PMC9273615; doi:10.1038/s41467-022-31628-2), 2022-07-11
Supplement: 41467_2022_31628_MOESM1_ESM.pdf [file 41467_2022_31628_MOESM1_ESM.pdf]

## Supplementary Figures

### **Regulation of AUXIN RESPONSE FACTOR condensation and nucleo-cytoplasmic partitioning**

Hongwei Jing<sup>1,2,3,\*</sup>, David A. Korasick<sup>4,\*</sup>, Ryan J. Emenecker<sup>2,3,4</sup>, Nicholas Morffy<sup>1,2,3</sup>, Edward G. Wilkinson<sup>1,2,3</sup>, Samantha K. Powers<sup>4</sup>, Lucia C. Strader<sup>1,2,3</sup>

#### Affiliations:

1. Department of Biology; Duke University; Durham, NC 27008; USA
2. Center for Engineering MechanoBiology; Washington University; St. Louis, MO 63130; USA
3. Center for Science and Engineering Living Systems (CSELS); Washington University; St. Louis, MO 63130; USA
4. Department of Biology; Washington University; St. Louis, MO 63130; USA

\* These authors contributed equally to this work

Correspondence: [lucia.strader@duke.edu](mailto:lucia.strader@duke.edu) (L.C.S.)

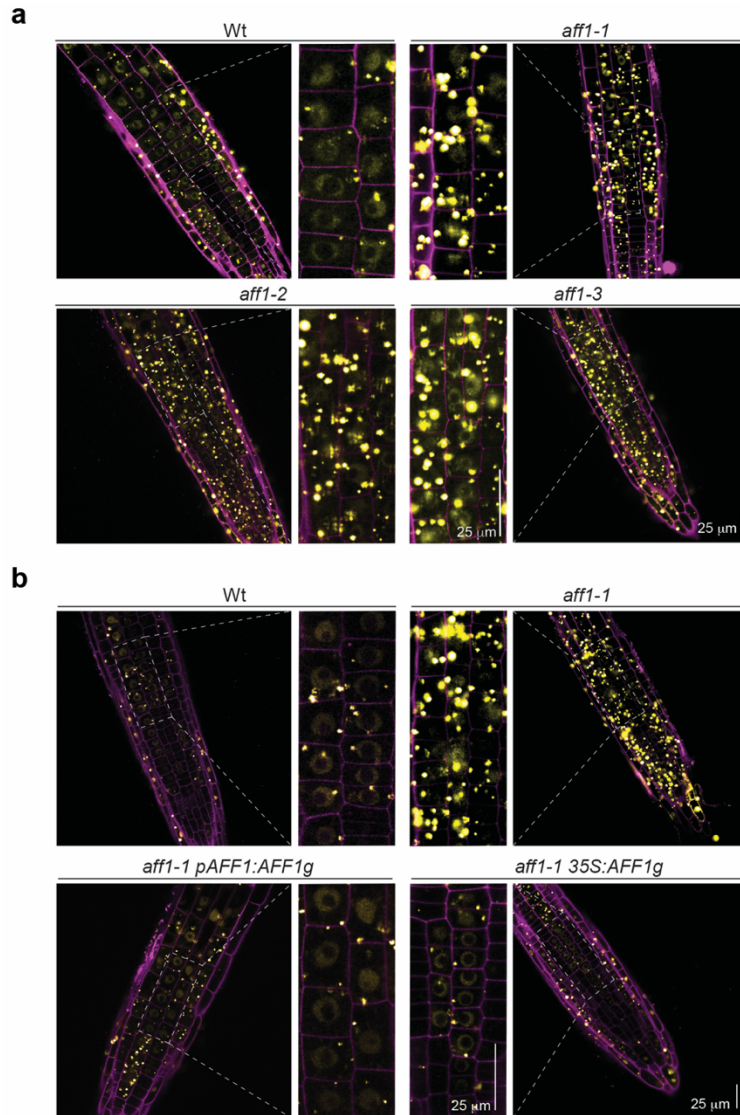

**Supplementary Figure 1. AFF1 complement the ARF19 hypercondensation in *aff1-1*.** (a) Confocal images of 3d-old wild type (Wt; Col-0), *aff1-1*, *aff1-2* and *aff1-3* seedlings carrying *35S:YFP-ARF19* (false-colored yellow) with cell walls counterstained with propidium iodide (false colored magenta). Scale bar = 25 μm. (b) Confocal images of 3d-old wild type (Wt; Col-0), *aff1-1*, *aff1-1 pAFF1:AFF1g* and *aff1-1 35S:AFF1g* seedlings carrying *35S:YFP-ARF19* (false-colored yellow) with cell walls counterstained with propidium iodide (false colored magenta). Scale bar = 25 μm. Three independent experiments were performed for (a) and (b) with similar results.

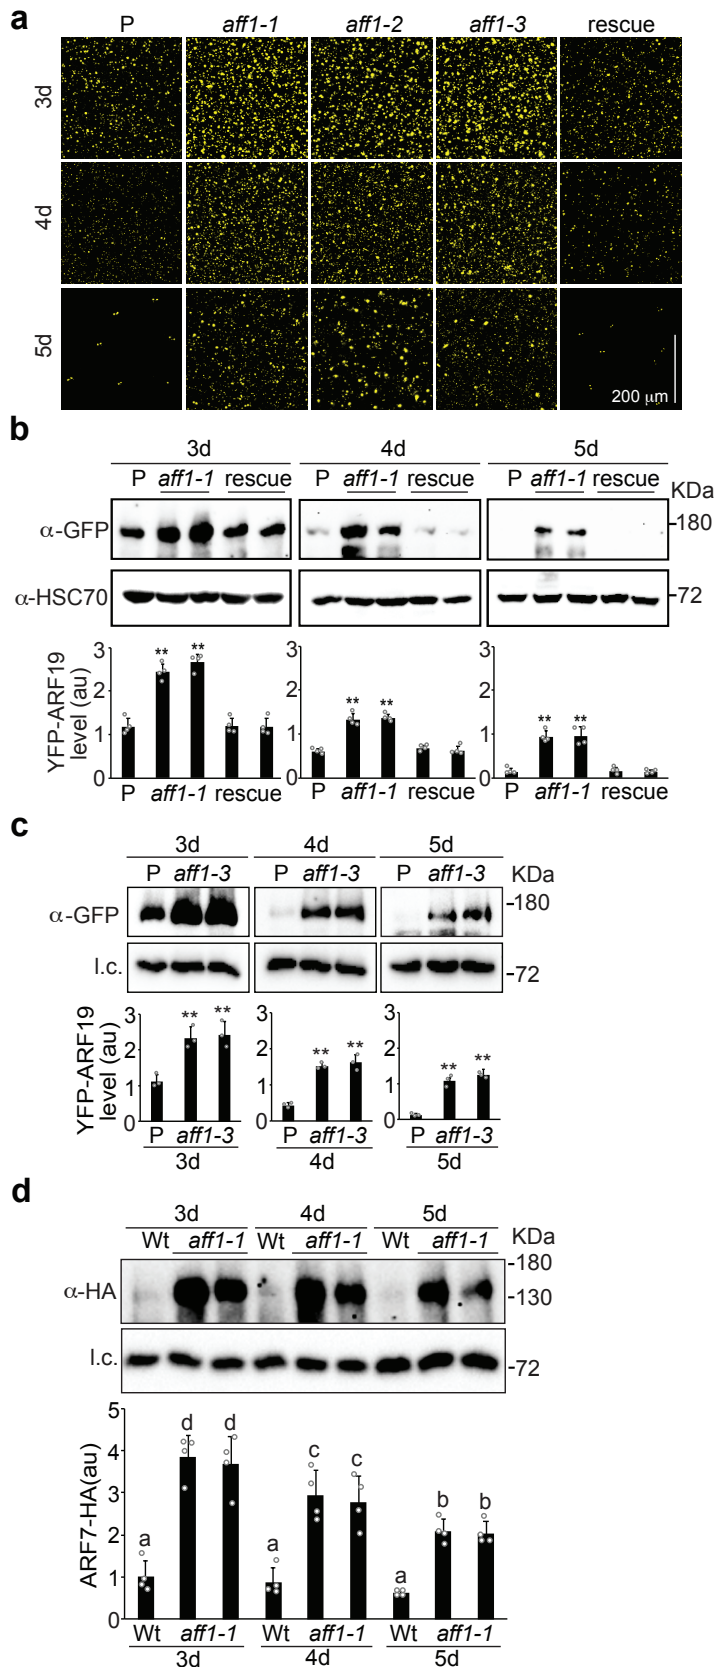

## Supplementary Figure 2. AFF1 complement the ARF19

### hyperaccumulation in *aff1-1*. (a)

Confocal microscopy images of 3d-, 4d-, or 5d-old *arf19-1* 35S:YFP-ARF19 (P), *aff1-1* 35S:YFP-ARF19, *aff1-2* 35S:YFP-ARF19, and *aff1-3* 35S:YFP-ARF19 and rescue line (*aff1-1 arf19-1* 35S:YFP-ARF19 *pAFF1:AFF1g*) seedling cotyledons. Three independent experiments were performed with similar results. Scale bar = 200  $\mu$ m. (b)

Immunoblot analysis of YFP-ARF19 from *arf19-1* 35S:YFP-ARF19 (P), *aff1-1 arf19-1* 35S:YFP-ARF19, and two independent rescue lines (*aff1-1 arf19-1* 35S:YFP-ARF19 *pAFF1:AFF1g*). Quantitative analysis of the relative levels of YFP-ARF19 proteins is presented below the blots. Data are mean  $\pm$  SD from four independent experiments and gray dots represent the individual values. The statistical significance was determined by a two-sided Student's *t*-test (Paired two sample for means). *P* values = 0.0018 (*aff1-1*\_3d), 0.00075 (*aff1-1*\_3d), 0.7589 (rescue\_3d), 0.8246 (rescue\_3d), 0.00089 (*aff1-1*\_4d), 0.00107 (*aff1-1*\_4d), 0.0965 (rescue\_4d), 0.8200 (rescue\_4d), 0.00235 (*aff1-1*\_5d), and 0.0078 (*aff1-1*\_5d), 0.4668 (rescue\_5d), 0.8322 (rescue\_5d). \*\* *P* < 0.01 when compared to P. (c)

Immunoblot analysis (top) and quantification (bottom) of 3d-, 4d-, or 5d-old wild type (Wt; Col-0) or *aff1-3* seedlings carrying 35S:YFP-ARF19. Anti-GFP antibodies were used to detect YFP-ARF19, and anti-HSC70 antibodies were used to detect HSC70 (l.c.; loading control). Data are mean  $\pm$  SD from three independent experiments and gray dots represent the individual values. The statistical significance was determined by a two-sided Student's *t*-test (Paired two sample for means). *P* values = 0.0036

(*aff1-3\_3d*), 0.0071 (*aff1-3\_3d*), 0.0014 (*aff1-3\_4d*), 0.0013 (*aff1-3\_4d*), 0.0014 (*aff1-3\_5d*), and 0.0037 (*aff1-5\_5d*). \*\*  $P < 0.01$  when compared to P. **(d)** Immunoblot analysis (top) and quantification (bottom) of 3d-, 4d-, or 5d-old wild type (Wt; Col-0) or *aff1-1* seedlings carrying *35S:ARF7-HA*. Anti- HA antibodies were used to detect ARF7-HA, and anti-HSC70 antibodies were used to detect HSC70 (l.c.; loading control). Data are mean  $\pm$  SD from four independent experiments and gray dots represent the individual values. Different letters indicate individual groups for multiple comparisons with significant differences (one-way ANOVA, Duncan,  $p < 0.05$ ). The source data in (b), (c) and (d) are provided as a Source Data file.

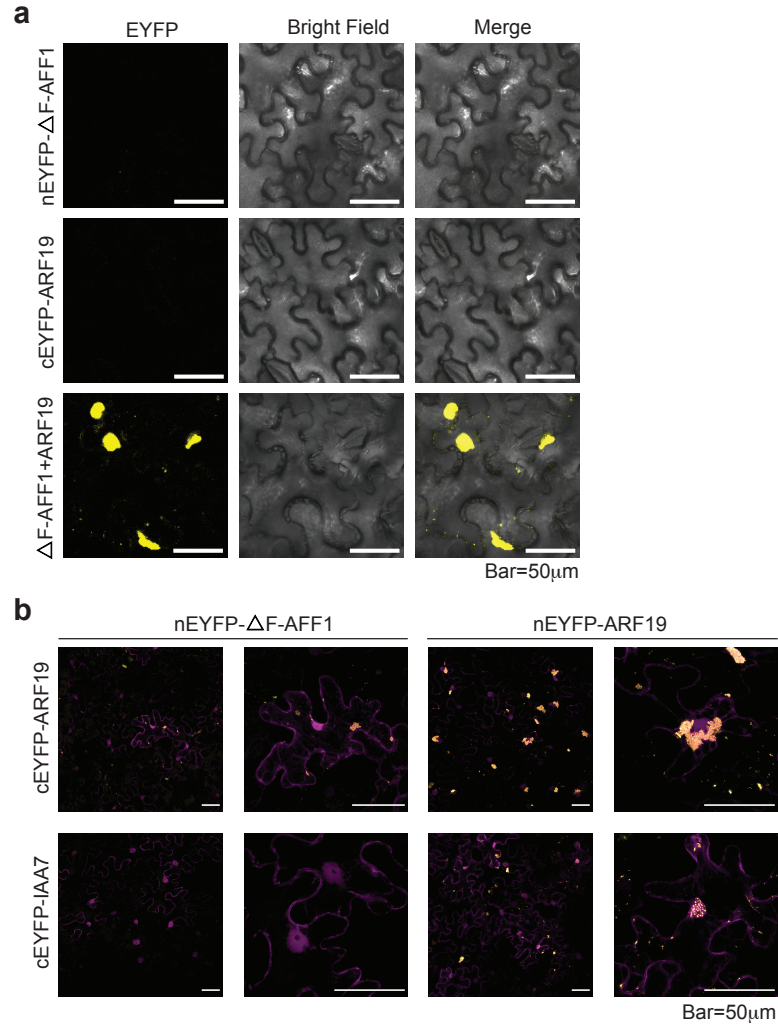

**Supplementary Figure 3. Interaction of ARF19 with  $\Delta$ F-box-AFF1 using BiFC experiment.**

(a) BiFC assays were used to determine the interaction between ARF19 with  $\Delta$ F-box-AFF1 when transiently expressed in tobacco leaves. nEYFP- $\Delta$ F-box-AFF1C denotes expression of the EYFP N-terminal fusion with  $\Delta$ F-box-AFF1C construct. cEYFP-ARF19C denotes expression of the EYFP C-terminal fusion with ARF19C construct. Scale bar = 50  $\mu$ m. (b) BiFC assays were used to analysis the interaction between nEYFP- $\Delta$ F-box-AFF1 and cEYFP-ARF19, between nEYFP- $\Delta$ F-box-AFF1 and cEYFP-IAA7, between nEYFP-ARF19 and cEYFP-ARF19, and between nEYFP-ARF19 and cEYFP-IAA7. Nuclear marker WPP-mCherry was co-expressed in the tobacco leaves. Scale bar = 50  $\mu$ m. Right panel images of each treatment were same as the Figure 5e. Three independent experiments were performed for (a) and (b) with similar results.

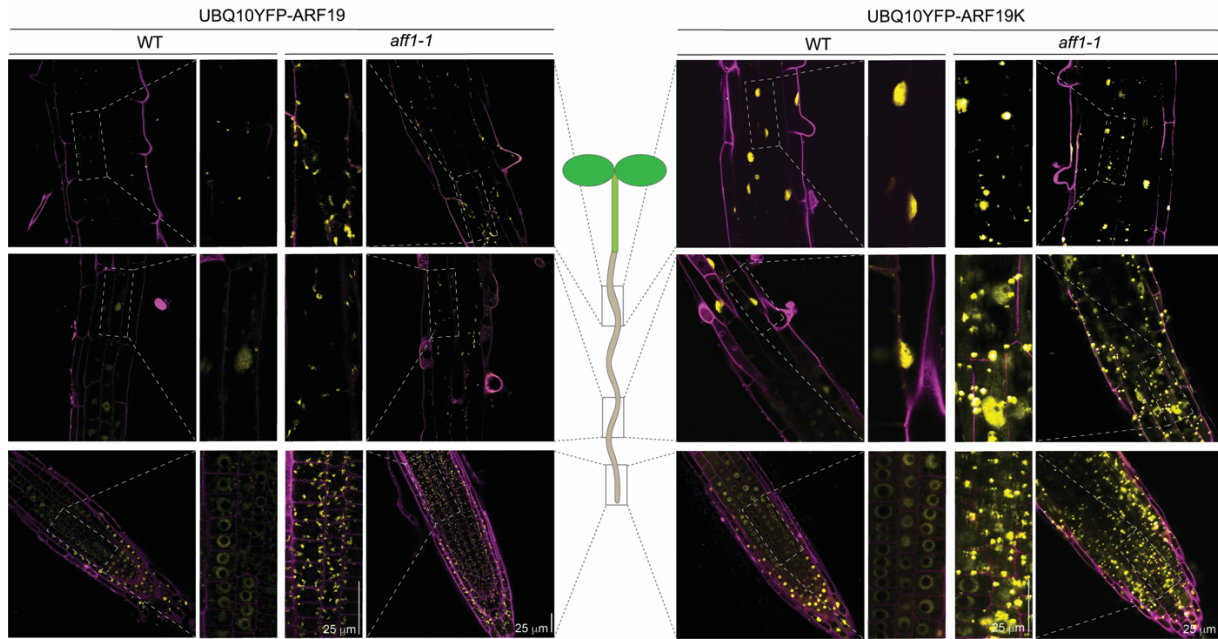

**Supplementary Figure 4. ARF19 and ARF19<sup>K962A</sup> form condensates in all root cells of *aff1-1*.** Confocal images of upper root, intermediate and root tip sections from 3d-old wild type (Wt; Col-0) or *aff1-1* seedlings carrying *UBQ10:YFP-ARF19* or *UBQ10:YFP-ARF19<sup>K962A</sup>* (false-colored yellow) with cell walls counterstained with propidium iodide (false-colored magenta). Scale bar = 25 μm. Three independent experiments were performed with similar results.

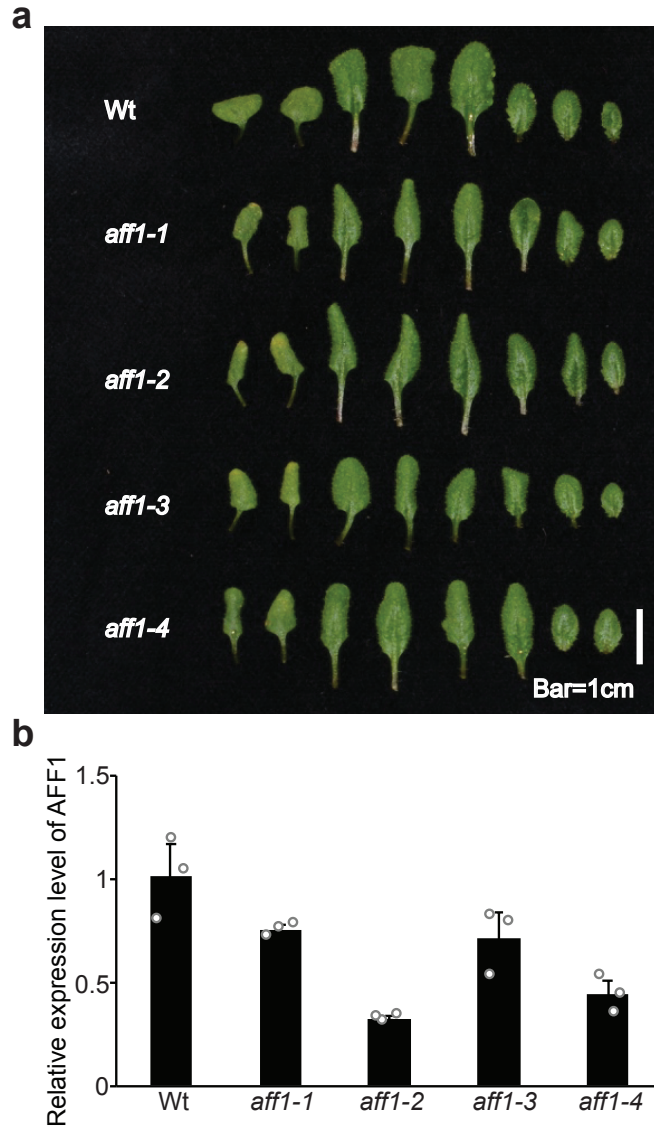

**Supplementary Figure 5. *AFF1* mutation exhibits developmental defects.** (a) Leaf phenotypes of 22d-old wild type (Col-0), *aff1-1*, *aff1-2*, *aff1-3*, and *aff1-4* plants. Scale bar = 1 cm. (b) Mean relative accumulation of *AFF1* transcript levels in wild type (Wt; Col-0), *aff1-1*, *aff1-2*, *aff1-3*, and *aff1-4* as assessed by qRT-PCR. Data are mean ± SD from three independent experiments and gray dots represent the individual values. The source data in (b) are provided as a Source Data file.

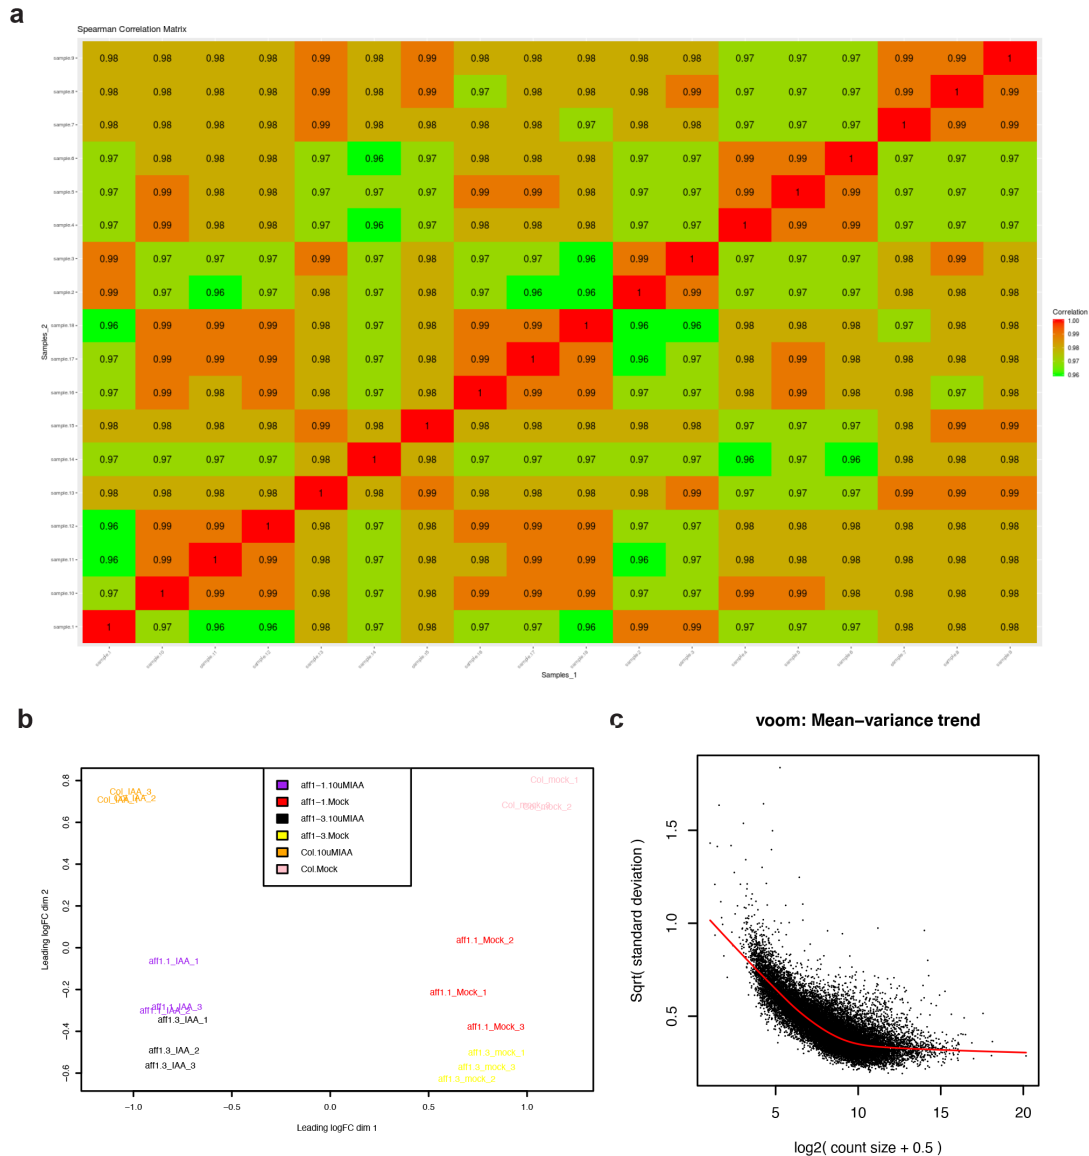

**Supplementary Figure 6. RNA-seq sample quality.** (a) Matrix of Spearman correlations of all detected genes greater than 1 count-per-million in at least 3 samples relative to each other. Samples of the same condition have very high correlations as expected across the diagonal with no outliers. (b) The quality of the samples in a multi-dimensional scaling plot of the leading log fold- changes. Samples for each condition cluster very tightly with each other with good cluster separation between samples of different conditions based on expression profiles. (c) Scatter plot of the empirically derived fitted and trended mean-variance relationship across all genes.



**Supplemental table 1: primers used in this study**

| Primers                    | Sequence (5'-3')                             | Experiments               |
|----------------------------|----------------------------------------------|---------------------------|
| ARF19_F                    | CACCCATATGAAAGCTCCATCAAATGG                  | pENTR-ARF19               |
| ARF19_R                    | CTCGAGCTATCTGTTGAAAGAAGCTGC                  | pENTR-ARF19               |
| AFF1-5                     | CCATAGAAGATTCGGCTTTGAC                       | <i>aff1-1</i> genotyping  |
| AFF1-Ddel                  | TCTCGGCATGTTAGAGAGAACTTGTTGCTA               | <i>aff1-1</i> genotyping  |
| AFF1g-F                    | CACCATGGATATATGTTGCAAAGAT                    | pENTR-AFF1g               |
| AFF1g-R                    | AATAGAAAGTAATGCCAATCACAAACAAG                | pENTR-AFF1g               |
| AFF1-P1                    | GAATTCgagctttgaaatcgaaacctcatcactaacatcaacgg | pENTR-AFF1p               |
| AFF1-P2                    | CTCGAGcctttttgaaatcactttgacagatctc           | pENTR-AFF1p               |
| AFF1-newCDS-ENTR-F         | CACCATGGATATATGTTGCAAAGATATAA                | pENTR-AFF1CDS             |
| AFF1-newCDS-ENTR-R         | TTAGACCTCGGGGATTATATAGACTGT                  | pENTR-AFF1CDS             |
| AFF1-newCDS-noFbox-ENTR-F  | CACCGTAGTATATCTTAATCCTGACG                   | pENTR- $\Delta$ F AFF1CDS |
| AFF1-newCDS-BamHI-F        | CC GGATCC ATGGATATATGTTGCAAAGATATAA          | pGEX4T-1-AFF1             |
| AFF1-newCDS-Sall-R         | CC GTCGAC TTAGACCTCGGGGATTATATAGACTGT        | pGEX4T-1-AFF1             |
| AFF1-newCDS-noFbox-BamHI-F | CC GGATCC GTAGTATATCTTAATCCTGACG             | pGEX4T-1- $\Delta$ F AFF1 |
| AFF1-2                     | CTGTCAAAGTAGATTCAAAAAGGATGG                  | qRT-PCR                   |
| AFF1-3                     | AGTGGCAGCATCTATTTGCTTTC                      | qRT-PCR                   |
| AFF1-4                     | GATATAATTAGTGATCTACCAGAAG                    | qRT-PCR                   |
| AFF1C-R-264                | AAACTCAATACTCTATCAACGAA                      | qRT-PCR                   |
| AFF1C-R-360                | GCGTTCATCACATTTGATATCCA                      | qRT-PCR                   |
| ACT7F2                     | TCCATGAAACAACCTTACAACCTCCATCA                | qRT-PCR                   |
| ACT7B2                     | CATCGTACTCACTCTTTGAAATCCACA                  | qRT-PCR                   |
| AFF1-newCDS-noTAA-ENTR-R   | GACCTCGGGGATTATATAGACTGT                     | pENTR-AFF1CDS             |
| AFF1-noF-ATG-newCDS-ENTR-F | CACCATGGTAGTATATCTTAATCCTGACG                | pENTR-AFF1CDS             |
| ASK1-F-CGC                 | CGCGGATCCATGTCTGCGAAGAAGATTGTGTTGA           | pET28a-ASK1               |
| ASK1-R-CCC                 | CCCAAGCTTCAGCTGTCATTCAAAGCCCATTTGGTTCT       | pET28a-ASK1               |
| Salk_053818C-LP            | TTTTTGTCTTTTGTCTTTTGC                        | <i>aff1-2</i> genotyping  |
| Salk_053818C-RP            | AAAGCCGTTATCACTGTGTGC                        | <i>aff1-2</i> genotyping  |
| SALK_083453-LP2            | TGAGCAAGGCACTGGTTCATC                        | <i>aff1-3</i> genotyping  |
| SALK_083453-RP2            | GACTGTGCATTTGACGAGGTT                        | <i>aff1-3</i> genotyping  |
| SAIL_427_G06-LP            | TGGCAGCATCTATTTGCTTTC                        | <i>aff1-4</i> genotyping  |
| SAIL_427_G06-RP            | TAGACACCCGTCAACATCCTC                        | <i>aff1-4</i> genotyping  |
| IAA7 F SalI                | caccggtcgacggATGATCGGCCAACTTATGAACC          | BiFC                      |
| IAA7 R NotI                | gcgccgcTCAAGATCTGTTCTTGAGTAC                 | BiFC                      |
| WPP-mCherry F              | caccGGTACCacgcgattg                          | BiFC                      |
| WPP-mCherry R              | catctagtaacatagatgacaccgc                    | BiFC                      |
